# Supplementary material for: Incorporation of gallium-68 into the crystal structure of Prussian blue to form K68GaxFe1−x[Fe(CN)6] nanoparticles: toward a novel bimodal PET/MRI imaging agent
Source: Royal Society of Chemistry journal article supplement (doi:10.1039/c6dt00962j), 2016-01-01
Supplement: c6dt00962j1.pdf [file c6dt00962j1.pdf]

Electronic Supplementary Material (ESI) for Dalton Transactions.  
This journal is © The Royal Society of Chemistry 2016

### **Incorporation of Gallium-68 into the Crystal Structure of Prussian Blue to Form $K^{68}Ga_xFe_{1-x}[Fe(CN)_6]$ Nanoparticles: Toward a Novel Bimodal PET/MRI Imaging Agent**

Murthi S. Kandanapitiye<sup>a</sup>, Matthew D. Gott<sup>b</sup>, Andrew Sharits<sup>c</sup>, Silvia S. Jurisson<sup>b</sup>, Patrick M. Woodward<sup>c</sup> and Songping D Huang<sup>a</sup>

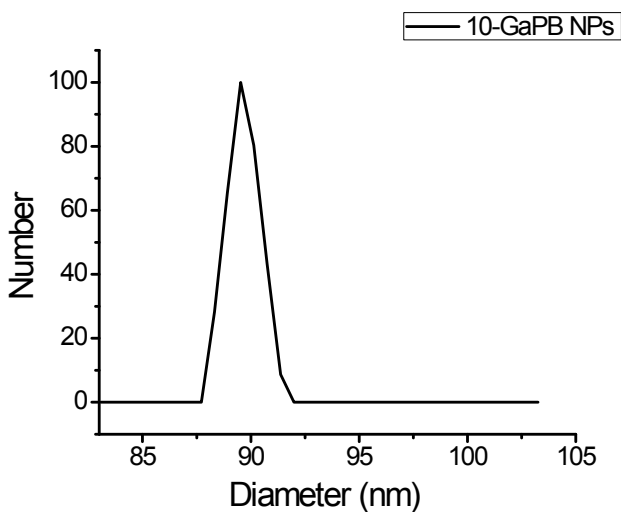

**Figure S1.** The DLS curve of PVP-citrate coated Ga@PBNPs.

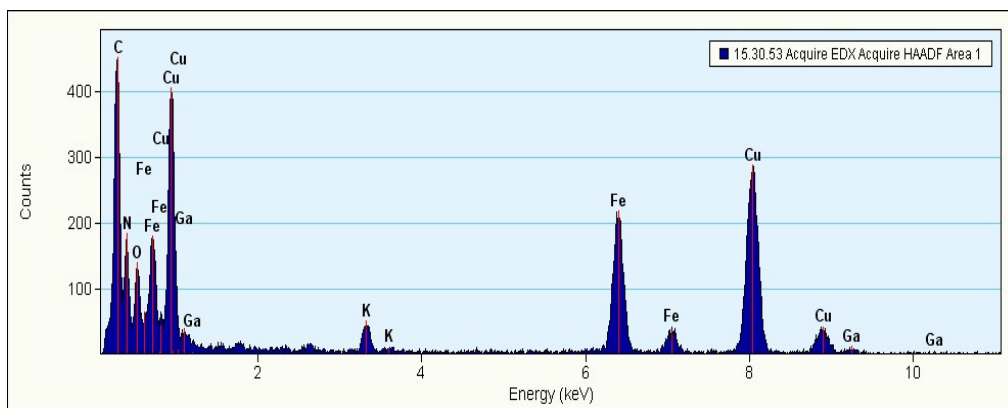

**Figure S2.** The EDX spectrum of PVP-citrate coated Ga@PBNPs.

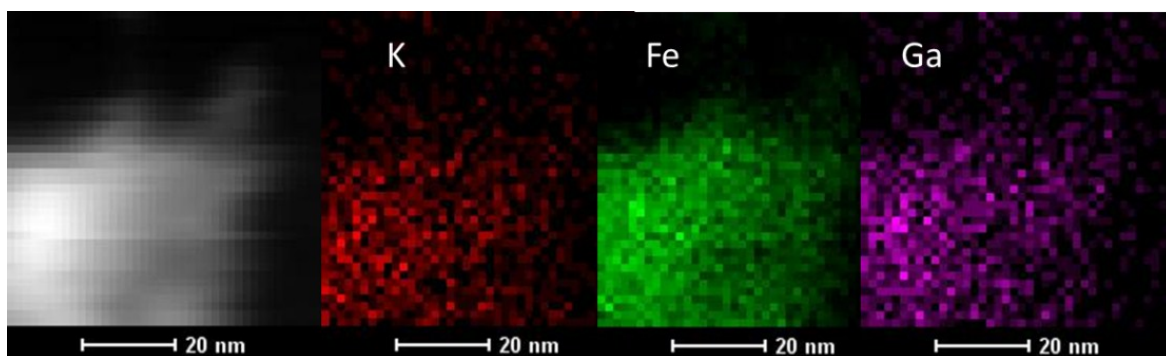

**Figure S3.** The EDS-STEM elemental mapping of the selected nanoparticles of PVP-citrate coated Ga@PBNPs.

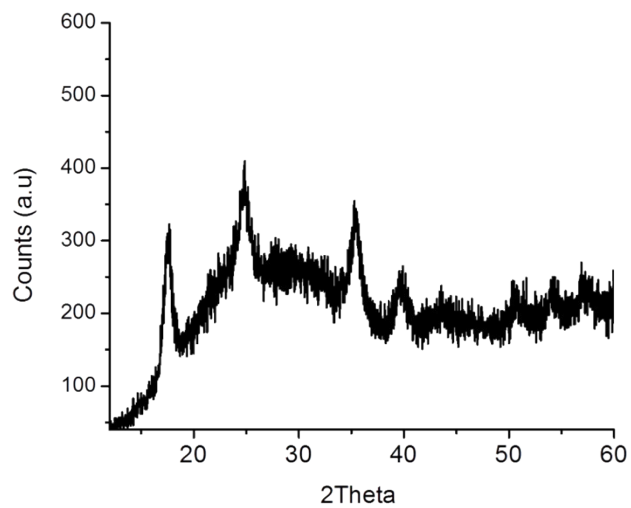

**Figure S4.** The X-ray powder diffraction patterns of PVP-citrate coated Ga@PBNPs.

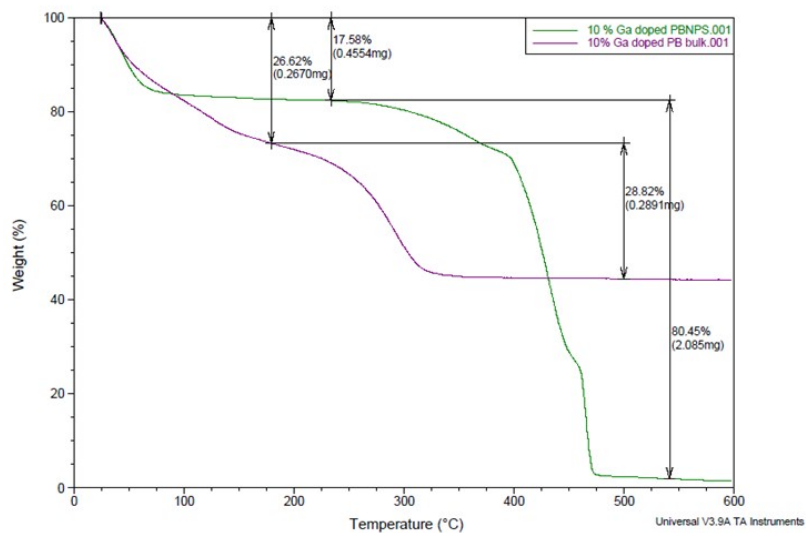

**Figure S5.** The TGA curve of PVP-citrate coated Ga@PBNPs (green) and the bulk  $\text{KGa}_{0.05}\text{Fe}_{0.95}[\text{Fe}(\text{CN})_6]$  (purple).

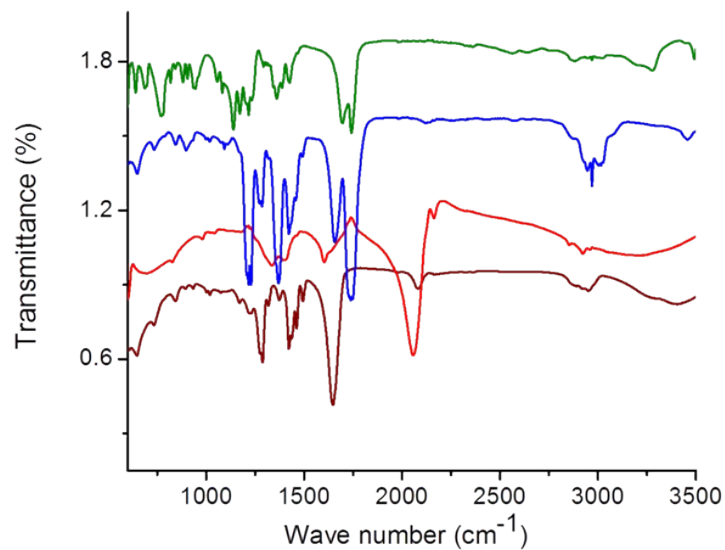

**Figure S6.** FT-IR spectra of citric acid (green), PVP40K (blue), PVP-citrate coated Ga@PBNPs (brown) and the bulk  $\text{KGa}_{0.05}\text{Fe}_{0.95}[\text{Fe}(\text{CN})_6]$  (red).

**Structure determination from the bulk sample:** Powder XRD patterns were recorded using a Bruker D8 Advance X-ray diffractometer ( $K\alpha$  radiation,  $K\beta$ -filter and LynxEye PSD detector) equipped with a LynxEye position detector and an incident beam Ge 111 monochromator. Powder patterns were measured from 10 to  $110^\circ 2\theta$  with step size of  $0.01446^\circ$  and exposition time 800 sec per step. Given the limited number of diffraction peaks, the free positional parameters of the carbon and nitrogen atoms were fixed to values reported for the structure of  $\text{KNi}[\text{Fe}(\text{CN})_6]_{0.3}[\text{Co}(\text{CN})_6]_{0.7}$ , (Widemann, A.; Kahlert, H.; Petrovic-Prelevic, I.; Wulff, H.; Yakhmi, J. V.; Bagkar, N.; Scholz, F. *Inorg. Chem.* 2002, 41, 5706-5715) as noted previously. The chosen values give a reasonable C–N distance for the cyanide group. Due to correlations in the refinement the displacement parameters for all atoms were constrained to be equal. The background was modeled with a six-term polynomial and the peak shape was modeled with a TCHZ pseudo-Voigt function (Fig S6).

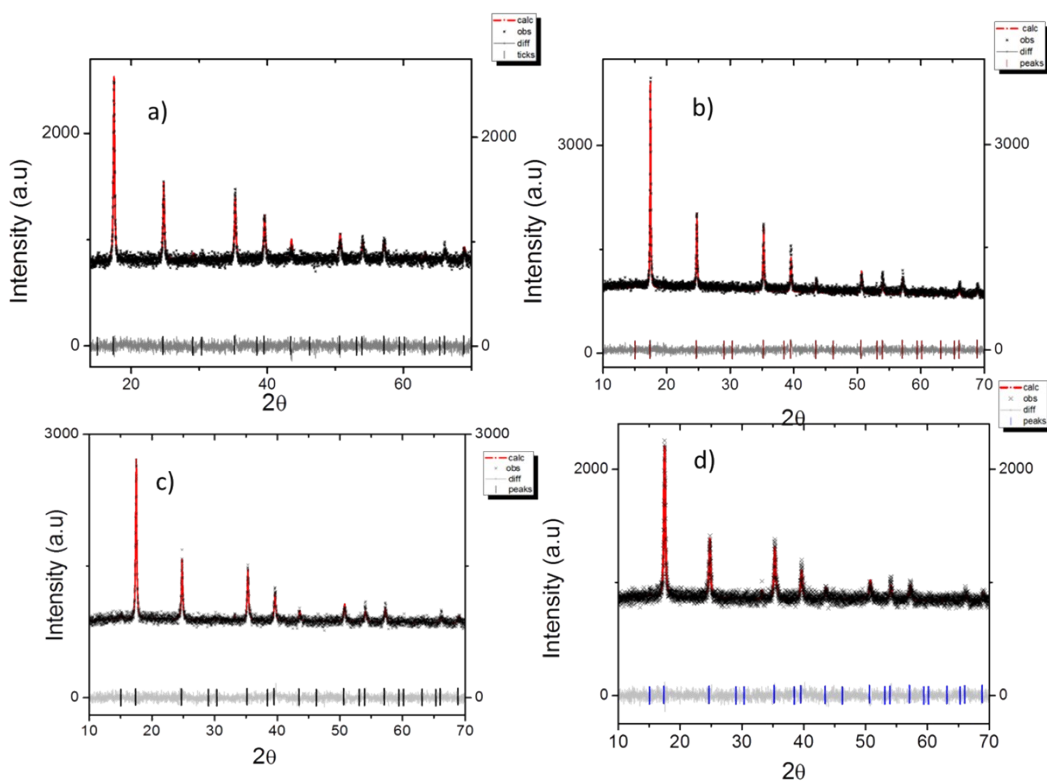

**Figure S7.** Observed XRD data for the bulk  $\text{KGa}_x\text{Fe}_{1-x}[\text{Fe}(\text{CN})_6] \cdot n\text{H}_2\text{O}$  given in black with calculated pattern given in red. The difference between observed and calculated is given in grey.

The tick marks denotes the peak location for the known structure. a)  $\text{KGa}_{0.02}\text{Fe}_{0.98}[\text{Fe}(\text{CN})_6] \cdot n\text{H}_2\text{O}$ ; b)  $\text{KGa}_{0.05}\text{Fe}_{0.95}[\text{Fe}(\text{CN})_6] \cdot n\text{H}_2\text{O}$ ; c)  $\text{KGa}_{0.07}\text{Fe}_{0.93}[\text{Fe}(\text{CN})_6] \cdot n\text{H}_2\text{O}$ ; d)  $\text{KGa}_{0.10}\text{Fe}_{0.90}[\text{Fe}(\text{CN})_6] \cdot n\text{H}_2\text{O}$ .

**Table S1.** Structural information obtained from XRD data of  $\text{KGa}_x\text{Fe}_{1-x}[\text{Fe}(\text{CN})_6]$  in space group  $Fm-3m$  (No. 225)

| Compositions                                                | a (Å)       | V (Å <sup>3</sup> ) | R <sub>wp</sub> | R <sub>exp</sub> |
|-------------------------------------------------------------|-------------|---------------------|-----------------|------------------|
| $\text{KGa}_{0.02}\text{Fe}_{0.98}[\text{Fe}(\text{CN})_6]$ | 10.1958 (1) | 1059.90 (4)         | 3.602           | 3.445            |
| $\text{KGa}_{0.05}\text{Fe}_{0.95}[\text{Fe}(\text{CN})_6]$ | 10.1925(7)  | 1058.87(2)          | 3.539           | 3.294            |
| $\text{KGa}_{0.07}\text{Fe}_{0.93}[\text{Fe}(\text{CN})_6]$ | 10.1847(1)  | 1056.44(3)          | 3.358           | 3.321            |
| $\text{KGa}_{0.10}\text{Fe}_{0.90}[\text{Fe}(\text{CN})_6]$ | 10.1856 (1) | 1056.72 (5)         | 3.406           | 3.359            |

**Table S2.** Results of elemental analysis for four different Ga-doped PB samples and their lattice parameters.

| Compound        | Empirical formula                                           | Chemical formula suggested by ICP-OES elemental analysis    | a (Å)   |
|-----------------|-------------------------------------------------------------|-------------------------------------------------------------|---------|
| 100% Ga PB      | $\text{KGa}[\text{Fe}(\text{CN})_6]$                        | $\text{KGa}_{0.92}\text{Fe}_{0.08}[\text{Fe}(\text{CN})_6]$ | 10.1274 |
| 5% Ga doped PB  | $\text{KGa}_{0.05}\text{Fe}_{0.95}[\text{Fe}(\text{CN})_6]$ | $\text{KGa}_{0.02}\text{Fe}_{0.98}[\text{Fe}(\text{CN})_6]$ | 10.1958 |
| 10% Ga doped PB | $\text{KGa}_{0.10}\text{Fe}_{0.90}[\text{Fe}(\text{CN})_6]$ | $\text{KGa}_{0.05}\text{Fe}_{0.95}[\text{Fe}(\text{CN})_6]$ | 10.1925 |
| 15% Ga doped PB | $\text{KGa}_{0.15}\text{Fe}_{0.95}[\text{Fe}(\text{CN})_6]$ | $\text{KGa}_{0.07}\text{Fe}_{0.93}[\text{Fe}(\text{CN})_6]$ | 10.1847 |
| 20% Ga doped PB | $\text{KGa}_{0.20}\text{Fe}_{0.95}[\text{Fe}(\text{CN})_6]$ | $\text{KGa}_{0.10}\text{Fe}_{0.90}[\text{Fe}(\text{CN})_6]$ | 10.1856 |

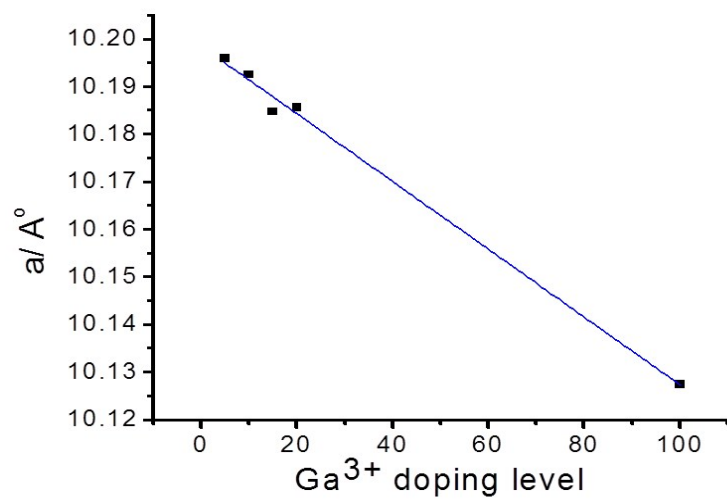

**Figure S8.** The Vegard's plot of lattice parameters in the  $\text{KGa}_x\text{Fe}_{1-x}[\text{Fe}(\text{CN})_6]$  series.

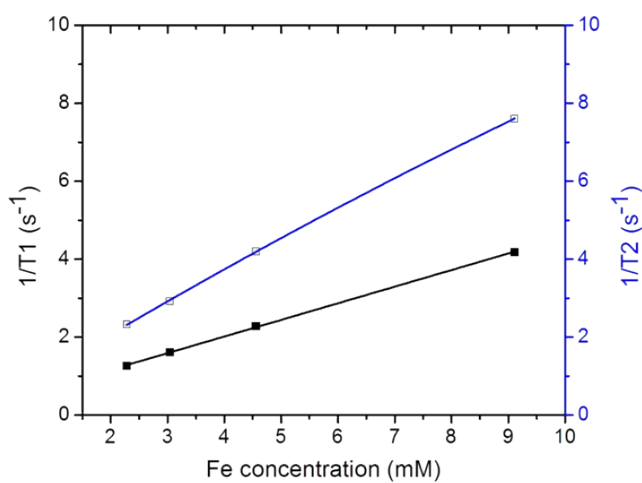

**Figure S9.** Plots of  $1/T_i$  ( $i = 1, 2$ ) vs the  $\text{Fe}^{3+}$  concentration at magnetic field strength of 1.4 T for PVP-citrate coated Ga@PBNPs.

**Surface functionalization of  $\text{KGa}_{0.05}\text{Fe}_{0.95}[\text{Fe}(\text{CN})_6]$  NPs by fluorescence dye molecules and cell uptake studies.** For the preparation of  $\text{KGa}_{0.05}\text{Fe}_{0.95}[\text{Fe}(\text{CN})_6]$ , an aqueous  $\text{Ga}^{3+}$  (0.1 mM),  $\text{Fe}^{3+}$  (0.9 mM) (total  $\text{M}^{3+}$  concentration-1 mM, 40 mL) solution containing PVP and citrate (average MW=40,000, ~ 400 mg, citric acid-200 mg) and 1.0 mL of 1 mM of ethylenediamine were slowly mixed and reacted with  $\text{K}_4[\text{Fe}(\text{CN})_6]$  (1.0 mM, 40 mL) under vigorous stirring. Primary amine functionalities available on nanoparticle surface allow the conjugation of carboxyfluorescein dye on  $\text{Ga@PB}$  NPs (*ca* 4 mM). Dialysis was performed using the MWCO-12000 membrane to remove the unreacted carboxyfluorescein dye. Fluorescence emission spectrum was acquired to confirm the surface functionalization (See S9).

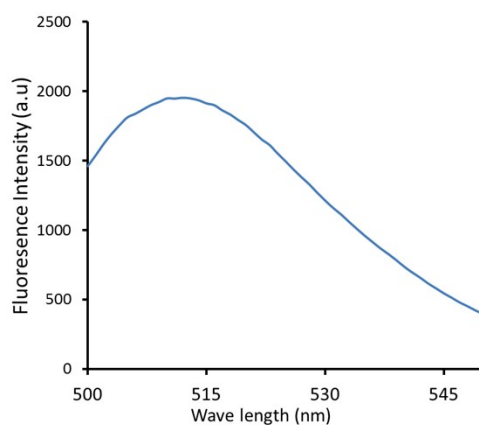

**Figure S10.** Fluorescence spectrum of carboxyfluorescein dye-labeled  $\text{Ga@PBNPs}$ .
